# Supplementary material for: Who perpetrates violence against children? A systematic analysis of age-specific and sex-specific data
Source: PubMed Central journal article supplement — BMJ Paediatr Open. 2018 Feb 7;2(1):e000180. doi: 10.1136/bmjpo-2017-000180 (PMC5842994; doi:10.1136/bmjpo-2017-000180), 2018-02-07
Supplement: bmjpo-2017-000180supp003.pdf [file bmjpo-2017-000180supp003.pdf]

## Annex 4. Covariates included in regression models

In this analysis, we sought to include a range of studies using various definitions and methodologies. We used meta-regression to correct for differences in definitions and study methods as much as possible. For each set of meta-regressions below, we describe which covariates were fit for each model and give an example of STATA 14 code used to fit these models. We do not present a table with regression coefficients and model fit statistics because a separate model was run for each age, sex, and specific form of violence (meaning the total number of models we would need to present would be in the region of 200).

### 4.0 Physical and emotional violence from household members

For these meta regressions, all data was drawn from the MICS and DHS (which uses the MICS survey module). These surveys utilized very similar definitions and methodological characteristics, and thus we have not adjusted for any covariates in these models. Here is an example of STATA code used to fit a meta-regression model to describe the prevalence of emotional violence by household members in 2-year-old girls:

```
xi, noomit: metareg prevt i.WHOregion if form=="emo" & perpsg=="Family" & sex=="girls" & age==2 , wsse(sep) noconstant
```

Where: Prevt= prevalence estimate %, WHOregion = WHO region, form= form of violence, perpsg= perpetrator type, sex=sex of victim, age = age of victim in years, sep = standard error %.

Code used for emotional violence:

```
1. forvalues a= 2/14{
2. set more off
3. cd "H:\02 know violence\meta analysis\regions"
4. use emofamgirls.dta, clear
5. drop if proxy==0
6. drop if age!=`a'
7. xi, noomit: metareg prevt i.WHOregion if form=="emo" & perpsg=="Family" & sex=="girls" & age==`a' , wsse(sep) noconstant
8. sort WHOregion
9. gen first=1 if WHOregion!=WHOregion[_n-1]
10. drop if first!=1
11. predict emofamgirls
12. predict se_est, stdp
13. gen LL=emofamgirls-1.96*se_est
14. gen UL=emofamgirls+1.96*se_est
15. l WHOregion emofamgirls LL UL
16. keep form perpsg age sex WHOregion emofamgirls LL UL se_est
17. save "H:\02 know violence\meta analysis\regions\emofamgirls_`a'_MICS.dta", replace
18. }
```

Example from log file for age 2:

```
H:\02 know violence\meta analysis\regions
(15 observations deleted)
```

(504 observations deleted)

|                                           |                 |        |
|-------------------------------------------|-----------------|--------|
| Meta-regression                           | Number of obs = | 42     |
| REML estimate of between-study variance   | tau2 =          | 222.2  |
| % residual variation due to heterogeneity | I-squared_res = | 94.83% |
| Joint test for all covariates             | Model F(6,36) = | 94.48  |
| With Knapp-Hartung modification           | Prob > F =      | 0.0000 |

| prevt         | Coef.    | Std. Err. | t     | P> t  | [95% Conf. Interval] |
|---------------|----------|-----------|-------|-------|----------------------|
| _IWHOregion_1 | 64.93803 | 4.601592  | 14.11 | 0.000 | 55.60557 74.27049    |
| _IWHOregion_2 | 43.49723 | 4.912136  | 8.86  | 0.000 | 33.53496 53.4595     |
| _IWHOregion_3 | 76.92928 | 6.19335   | 12.42 | 0.000 | 64.36858 89.48997    |
| _IWHOregion_4 | 42.71171 | 4.997839  | 8.55  | 0.000 | 32.57562 52.8478     |
| _IWHOregion_5 | 67.74983 | 10.82758  | 6.26  | 0.000 | 45.79047 89.70918    |
| _IWHOregion_6 | 51.9713  | 10.86949  | 4.78  | 0.000 | 29.92695 74.01564    |

(36 missing values generated)

(36 observations deleted)

(option xb assumed; fitted values)

|    | WHOreg~n | emofam~s | LL       | UL       |
|----|----------|----------|----------|----------|
| 1. | AFR      | 64.93803 | 55.91891 | 73.95715 |
| 2. | AMR      | 43.49723 | 33.86944 | 53.12502 |
| 3. | EMR      | 76.92928 | 64.79031 | 89.06824 |
| 4. | EUR      | 42.71171 | 32.91594 | 52.50747 |
| 5. | SEAR     | 67.74982 | 46.52776 | 88.97189 |
| 6. | WPR      | 51.9713  | 30.6671  | 73.2755  |

#### 4.1 Physical and emotional violence from students

The covariates included in meta-regression models for emotional and physical violence from students were:

- < Violence definition=0 if definition, 1-x if not (1) (variable name: def\_phy)
  - < Definition of physical violence: hit or hurt by another student at school.
  - < Definition of emotional violence: something stolen from you at school, made fun of or called names at school, left out of games or activities by other students at school, made to do things you didn't want to do by other students, someone spread lies about you at school.
- < Areas mixed urban and rural=0, 1 if urban (variable name: urban)
  - < Area was not included in emotional violence to simplify the model because there was almost no variation in this variable.
- < Subnational =0 if national, 1 if subnational. (variable name: rep)
- < Interviewer trained =0 if trained, 1 if not or unclear. (variable name: interviewer)
- < Recall period=0 if 12 months, 1 if under 12 months. (variable name: recallad)
- < Proxy report=0 if child self reported, 1 if proxy report. (variable name: proxy)
- < Study violence missing data recorded as under 5% =0, 1 if not. (variable name: missing)
- < Standard Error obtained from study=0, 1 if derived. (variable name: seissue)

Here is an example of STATA code used to fit meta-regression model to describe the prevalence of physical violence from students among 8-year-old boys:

```
xi, noomit: metareg prevt i.WHOregion i.def_phy recallad rep urban interview proxy seissue  
missing if form=="emo" & perpsg=="Peer_as" & sex=="boys" & age==8 , wsse(sep) noconstant
```

Where: Prevt= prevalence estimate %, WHOregion = WHO region, form= form of violence, perpsg= perpetrator type, sex=sex of victim, age = age of victim in years, sep = standard error %.

Code used for physical violence:

```
1. forvalues a= 8/18{  
2. set more off  
3. cd "H:\02 know violence\meta analysis\regions"  
4. use phystubboys.dta, clear  
5. drop if age!=`a'  
6. xi, noomit: metareg prevt i.WHOregion i.def_phy recallad rep urban proxy interview seissue  
missing if form=="phy" & perpsg=="Peer_as" & sex=="boys" & age==`a' , wsse(sep) noconstant  
7. sort WHOregion  
8. gen first=1 if WHOregion!=WHOregion[_n-1]  
9. drop if first!=1  
10. replace def_phy=0  
11. replace recallad=0  
12. replace rep=0  
13. replace urban=0  
14. replace proxy=0  
15. replace interview=0  
16. replace seissue=0  
17. replace missing=0  
18. predict phystubboys  
19. predict se_est, stdp  
20. gen LL=phystubboys-1.96*se_est  
21. gen UL=phystubboys+1.96*se_est  
22. l WHOregion phystubboys LL UL  
23. keep form perpsg age sex WHOregion phystubboys se_est LL UL  
24. save "H:\02 know violence\meta analysis\regions\phystubboys_`a'.dta", replace  
25. }
```

Example from log file for age 8

```
H:\02 know violence\meta analysis\regions  
(2,105 observations deleted)  
note: _IWHOregion_1 dropped because of collinearity  
note: rep dropped because of collinearity  
note: urban dropped because of collinearity  
note: proxy dropped because of collinearity  
note: interview dropped because of collinearity
```

|                                           |                |   |        |
|-------------------------------------------|----------------|---|--------|
| Meta-regression                           | Number of obs  | = | 52     |
| REML estimate of between-study variance   | tau2           | = | 227.1  |
| % residual variation due to heterogeneity | I-squared_res  | = | 78.04% |
| Joint test for all covariates             | Model F(10,42) | = | 34.29  |
| With Knapp-Hartung modification           | Prob > F       | = | 0.0000 |

| prevt         | Coef.     | Std. Err. | t     | P> t  | [95% Conf. Interval] |           |
|---------------|-----------|-----------|-------|-------|----------------------|-----------|
| _IWHOregion_2 | 15.9216   | 13.8489   | 1.15  | 0.257 | -12.02661            | 43.86981  |
| _IWHOregion_3 | 15.70263  | 13.41972  | 1.17  | 0.249 | -11.37946            | 42.78472  |
| _IWHOregion_4 | 9.694549  | 14.51083  | 0.67  | 0.508 | -19.58949            | 38.97859  |
| _IWHOregion_5 | 20.77766  | 17.91199  | 1.16  | 0.253 | -15.3702             | 56.92552  |
| _IWHOregion_6 | 29.17286  | 16.16236  | 1.80  | 0.078 | -3.444109            | 61.78982  |
| _Idef_phy_0   | 39.06331  | 15.01724  | 2.60  | 0.013 | 8.757285             | 69.36933  |
| _Idef_phy_4   | 42.9      | 16.02697  | 2.68  | 0.011 | 10.55626             | 75.24373  |
| recallad      | -21.28366 | 6.288703  | -3.38 | 0.002 | -33.97478            | -8.592546 |
| seissue       | -3.862676 | 21.16843  | -0.18 | 0.856 | -46.5823             | 38.85695  |
| missing       | 4.050647  | 6.343839  | 0.64  | 0.527 | -8.751739            | 16.85303  |

(46 missing values generated)  
(46 observations deleted)  
(3 real changes made)  
(5 real changes made)  
(0 real changes made)  
(3 real changes made)  
(option xb assumed; fitted values)

|    | WHOreg~n | phystu~s | LL       | UL       |
|----|----------|----------|----------|----------|
| 1. | AFR      | 42.9     | 11.48714 | 74.31286 |
| 2. | AMR      | 58.82159 | 39.50122 | 78.14197 |
| 3. | EMR      | 54.76594 | 40.79076 | 68.74113 |
| 4. | EUR      | 48.75785 | 38.01067 | 59.50504 |
| 5. | SEAR     | 63.67765 | 36.78078 | 90.57452 |
| 6. | WPR      | 68.23617 | 48.23888 | 88.23345 |

file H:\02 know violence\meta analysis\regions\phystuboyes\_8.dta saved

#### 4.2 Physical, emotional and sexual violence from intimate partners

The covariates included in meta-regression models for physical violence from partners were:

- < Subnational =0 if national, 1 if subnational.
- < Sample from community=0, 1 if school. (variable name: samp)
- < Interviewer trained =0 if trained, 1 if not or unclear.
- < Recall period=0 if 12 months, 1 if not.\*
- < Violence definition gold standard 0, 1 if not. (variable name: acts)
  - < DHS, RHS, WHO VAW and Publications that asked about 5 or more acts of physical violence were set as the gold standard e.g.: DHS 1) pushed her, shaken her, thrown something at her, 2) slap her or twist her arm, 3) punched her with his fist or with something that could hurt her 4) kicked her, dragged her, 5) tried to strangle her or burn her, 6) threatened her with a knife, gun or other type of weapon.

\* one estimate for approximately 18 month recall (age 15).

The covariates included in meta-regression models for emotional violence from partners were:

- < Violence definition gold standard 0, 1 if not.

- ◁ DHS, RHS, WHO VAW definition was set as the gold standard; some variation but all DHS/RHS ask 2 or 3 modified CTS questions and WHO VAW 4 questions, e.g. DHS: 1) said or done something to humiliate her in front of others; 2) threatened to hurt or harm her or someone close to her; 3) insulted her or made her feel bad about herself.

The covariates included in meta-regression models for sexual violence from partners were:

- ◁ Subnational =0 if national, 1 if subnational.
- ◁ Sample from community=0, 1 if school
- ◁ Area mixed urban and rural =0, rural=1
- ◁ Violence definition gold standard =0, 1 if not.
  - ◁ DHS surveys only with 3 or more sexual violence questions and WHO VAW surveys which asked 4 questions were considered gold standard e.g.: DHS with the minimum number of 3 questions: 1) physically forced her to have unwanted sexual intercourse or 2) forced her to perform any other unwanted sexual acts, 3) forced her with threats or in any other way to perform sexual acts she did not want to.

Here are examples of STATA code used to fit meta-regression model to describe the prevalence of physical, emotional and sexual violence from students among 17-year-old girls:

Physical:

```
xi, noomit: metareg prevps i.WHOregion rep acts samp interview recallad if form=="phy" & perpsg=="Partner" & sex=="girls" & age==17 , wsse(sep) noconstant
```

Emotional:

```
xi, noomit: metareg prevps i.WHOregion acts if form=="emo" & perpsg=="Partner" & sex=="girls" & age==17 , wsse(sep) noconstant
```

Sexual:

```
xi, noomit: metareg prevps i.WHOregion acts rep samp urban if form=="sex" & perpsg=="Partner" & sex=="girls" & age==17 , wsse(sep) noconstant
```

Where: Prevs= percentage prevalence estimate adjusted by proportion of country population ever had sex by aged 20, sep = standard error %, form= form of violence, perpsg= perpetrator subgroup.

Code used for physical violence:

1. forvalues a= 15/19{
2. set more off
3. cd "H:\02 know violence\meta analysis\regions"
4. use phyipvgirls\_220817.dta, clear
5. drop if age!=`a'
6. xi, noomit: metareg prevps i.WHOregion rep acts samp interview recallad if form=="phy" & perpsg=="Partner" & sex=="girls" & age==`a' , wsse(sep) noconstant
7. sort WHOregion
8. gen first=1 if WHOregion!=WHOregion[\_n-1]
9. drop if first!=1
10. replace rep=0
