# Supplementary material for: Who perpetrates violence against children? A systematic analysis of age-specific and sex-specific data
Source: PubMed Central journal article supplement — BMJ Paediatr Open. 2018 Feb 7;2(1):e000180. doi: 10.1136/bmjpo-2017-000180 (PMC5842994; doi:10.1136/bmjpo-2017-000180), 2018-02-07
Supplement: bmjpo-2017-000180supp005.pdf [file bmjpo-2017-000180supp005.pdf]

## Annex 5: Pooled meta-regression prevalence estimates of violence against children, with 95% confidence interval

Figure 5.0. Prevalence of physical and emotional violence perpetrated by students against boys and girls, by age of child (based on self-report)

| age | Boys Emotional |       |       | Boys Physical |       |       |
|-----|----------------|-------|-------|---------------|-------|-------|
|     | Prev%          | LCI   | UCI   | Prev%         | LCI   | UCI   |
| 18  | 32.35          | 27.13 | 37.57 | 11.10         | 4.24  | 17.95 |
| 17  | 52.11          | 46.13 | 58.09 | 20.98         | 16.16 | 25.81 |
| 16  | 51.31          | 47.35 | 55.27 | 19.21         | 16.15 | 22.27 |
| 15  | 52.97          | 49.71 | 56.22 | 22.06         | 19.37 | 24.76 |
| 14  | 54.54          | 51.67 | 57.41 | 24.58         | 21.91 | 27.25 |
| 13  | 55.37          | 52.08 | 58.66 | 26.10         | 23.46 | 28.74 |
| 12  | 56.43          | 52.36 | 60.50 | 31.51         | 27.84 | 35.18 |
| 11  | 83.27          | 78.23 | 88.31 | 51.13         | 47.43 | 54.83 |
| 10  | 83.37          | 79.32 | 87.42 | 53.22         | 49.13 | 57.31 |
| 9   | 82.21          | 77.25 | 87.17 | 53.76         | 48.68 | 58.85 |
| 8   | 73.42          | 63.18 | 83.67 | 53.75         | 42.70 | 64.80 |

| age | Girls Emotional |       |       | Girls Physical |       |       |
|-----|-----------------|-------|-------|----------------|-------|-------|
|     | Prev%           | LCI   | UCI   | Prev%          | LCI   | UCL   |
| 18  | 27.90           | 21.66 | 34.15 | 9.22           | 3.51  | 14.94 |
| 17  | 55.25           | 44.27 | 66.23 | 17.70          | 9.69  | 25.71 |
| 16  | 51.38           | 46.61 | 56.15 | 16.35          | 13.19 | 19.51 |
| 15  | 53.84           | 50.23 | 57.45 | 16.56          | 13.85 | 19.28 |
| 14  | 53.22           | 50.16 | 56.29 | 15.64          | 11.92 | 19.36 |
| 13  | 52.90           | 49.94 | 55.86 | 16.72          | 13.75 | 19.68 |
| 12  | 54.88           | 50.19 | 59.57 | 23.56          | 19.60 | 27.52 |
| 11  | 80.18           | 75.45 | 84.91 | 39.94          | 35.93 | 43.94 |
| 10  | 78.72           | 74.54 | 82.91 | 42.89          | 38.79 | 46.99 |
| 9   | 79.33           | 74.62 | 84.03 | 43.67          | 38.79 | 48.55 |
| 8   | 74.84           | 66.64 | 83.04 | 48.97          | 40.77 | 57.17 |

Abbreviations: Prev%: Prevalence estimate; LCI: Lower 95% confidence interval; UCI: Upper 95%CI

Figure 5.1. Prevalence of physical and emotional violence perpetrated by household members against boys and girls, by age of child (based on proxy report from household member)

| age | Boys Emotional |       |       | Boys Physical |       |       |
|-----|----------------|-------|-------|---------------|-------|-------|
|     | Prev%          | LCI   | UCI   | Prev%         | LCI   | UCI   |
| 14  | 67.89          | 60.94 | 74.84 | 40.87         | 33.8  | 47.94 |
| 13  | 72.12          | 65.93 | 78.32 | 47.7          | 39.61 | 55.79 |
| 12  | 73.24          | 66.44 | 80.04 | 53.08         | 45.53 | 60.62 |
| 11  | 75.11          | 67.97 | 82.24 | 54.2          | 46.5  | 61.9  |
| 10  | 75.76          | 68.51 | 83.01 | 57.32         | 49.66 | 64.97 |
| 9   | 74.56          | 67.48 | 81.64 | 61.69         | 54.39 | 68.99 |
| 8   | 74.46          | 67.08 | 81.85 | 60.86         | 53.12 | 68.6  |
| 7   | 74.36          | 67.30 | 81.43 | 64.67         | 57.71 | 71.63 |
| 6   | 72.96          | 66.56 | 79.37 | 64.99         | 57.36 | 72.63 |
| 5   | 72.60          | 65.27 | 79.93 | 65.25         | 57.85 | 72.64 |
| 4   | 69.99          | 62.79 | 77.19 | 64.79         | 58.46 | 71.13 |
| 3   | 68.24          | 60.84 | 75.64 | 63.28         | 56.62 | 69.94 |
| 2   | 61.16          | 53.37 | 68.95 | 58.65         | 51.76 | 65.54 |

| age | Girls Emotional |       |       | Girls Physical |       |       |
|-----|-----------------|-------|-------|----------------|-------|-------|
|     | Prev%           | LCI   | UCL   | Prev%          | LCI   | UCI   |
| 14  | 65.21           | 58.85 | 71.57 | 35.86          | 28.16 | 43.55 |
| 13  | 67.01           | 60.52 | 73.50 | 40.06          | 32.47 | 47.65 |
| 12  | 70.60           | 64.01 | 77.18 | 46.14          | 38.18 | 54.11 |
| 11  | 70.38           | 63.74 | 77.03 | 47.20          | 39.01 | 55.39 |
| 10  | 71.52           | 64.06 | 78.98 | 52.80          | 45.46 | 60.15 |
| 9   | 73.47           | 66.95 | 79.99 | 55.53          | 47.09 | 63.97 |
| 8   | 72.56           | 65.85 | 79.26 | 57.46          | 50.53 | 64.39 |
| 7   | 73.72           | 66.97 | 80.47 | 60.83          | 52.90 | 68.75 |
| 6   | 71.07           | 63.98 | 78.15 | 60.38          | 52.75 | 68.01 |
| 5   | 70.91           | 63.30 | 78.52 | 60.58          | 52.93 | 68.22 |
| 4   | 69.93           | 62.66 | 77.21 | 63.15          | 55.98 | 70.32 |
| 3   | 65.84           | 58.54 | 73.14 | 60.87          | 54.31 | 67.43 |
| 2   | 59.85           | 52.09 | 67.61 | 56.24          | 49.20 | 63.28 |

Abbreviations: Prev%: Prevalence estimate; LCI: Lower 95% confidence interval; UCI: Upper 95%CI

Figure 5. Prevalence of sexual, physical and emotional violence perpetrated by intimate partners against girls, by age group (based on self-report)

| Girls Sexual |       |       |      |
|--------------|-------|-------|------|
| age          | Prev% | LCI   | UCI  |
| 19           | 5.17  | 3.29  | 7.04 |
| 18           | 5.86  | 3.67  | 8.04 |
| 17           | 3.66  | 1.99  | 5.33 |
| 16           | 3.40  | 1.21  | 5.58 |
| 15           | 1.50  | -0.34 | 3.35 |

| Girls Physical |       |       |       |
|----------------|-------|-------|-------|
| age            | Prev% | LCI   | UCI   |
| 19             | 12.55 | 10.10 | 15.00 |
| 18             | 11.73 | 9.14  | 14.32 |
| 17             | 12.92 | 9.29  | 16.55 |
| 16             | 10.01 | 6.20  | 13.81 |
| 15             | 7.06  | 3.28  | 10.85 |

| Girls Emotional |       |       |       |
|-----------------|-------|-------|-------|
| age             | Prev% | LCI   | UCI   |
| 19              | 13.24 | 10.01 | 16.47 |
| 18              | 12.98 | 10.05 | 15.90 |
| 17              | 9.48  | 6.32  | 12.64 |
| 16              | 8.27  | 4.85  | 11.69 |
| 15              | 8.07  | 4.11  | 12.03 |

**Abbreviations:** Prev%: Prevalence estimate; LCI: Lower 95% confidence interval; UCI: Upper 95%CI
