# Supplementary material for: Who perpetrates violence against children? A systematic analysis of age-specific and sex-specific data
Source: PubMed Central journal article supplement — BMJ Paediatr Open. 2018 Feb 7;2(1):e000180. doi: 10.1136/bmjpo-2017-000180 (PMC5842994; doi:10.1136/bmjpo-2017-000180), 2018-02-07
Supplement: bmjpo-2017-000180supp006.pdf [file bmjpo-2017-000180supp006.pdf]

## Annex 7: Data sources available for prevalence of violence against children estimates

Table 7.0. Number of violence estimates (sexual, physical, emotional or neglect) per WHO region for each dataset source included in the current study

| Source                       | WHO region               |                           |                                           |                           |                                       |                                     | Total         |
|------------------------------|--------------------------|---------------------------|-------------------------------------------|---------------------------|---------------------------------------|-------------------------------------|---------------|
|                              | AFR<br>African<br>region | AMR<br>Americas<br>region | EMR<br>Eastern<br>Mediterranean<br>region | EUR<br>European<br>region | SEAR<br>South-<br>east Asia<br>region | WPR<br>Western<br>Pacific<br>region |               |
| <b>DHS</b>                   | 702                      | 303                       | 195                                       | 88                        | 59                                    | 52                                  | <b>1,399</b>  |
| <b>RHS</b>                   | 0                        | 116                       | 0                                         | 0                         | 0                                     | 0                                   | <b>116</b>    |
| <b>WHO</b>                   | 40                       | 32                        | 0                                         | 4                         | 52                                    | 16                                  | <b>144</b>    |
| <b>MICS</b>                  | 416                      | 520                       | 208                                       | 468                       | 104                                   | 104                                 | <b>1,820</b>  |
| <b>VACS</b>                  | 144                      | 70                        | 0                                         | 0                         | 0                                     | 0                                   | <b>214</b>    |
| <b>GSHS</b>                  | 394                      | 506                       | 278                                       | 236                       | 28                                    | 248                                 | <b>1,690</b>  |
| <b>HBSC</b>                  | 0                        | 24                        | 0                                         | 984                       | 0                                     | 0                                   | <b>1,008</b>  |
| <b>PIRLS</b>                 | 84                       | 357                       | 380                                       | 1,148                     | 48                                    | 174                                 | <b>2,191</b>  |
| <b>TIMSS</b>                 | 272                      | 420                       | 1,272                                     | 1,464                     | 118                                   | 574                                 | <b>4,120</b>  |
| <b>GSS</b>                   | 432                      | 0                         | 0                                         | 0                         | 0                                     | 0                                   | <b>432</b>    |
| <b>Optimus</b>               | 0                        | 0                         | 0                                         | 0                         | 0                                     | 152                                 | <b>152</b>    |
| <b>EU kids</b>               | 0                        | 0                         | 0                                         | 400                       | 0                                     | 0                                   | <b>400</b>    |
| <b>Systematic<br/>review</b> | 3                        | 31                        | 0                                         | 86                        | 8                                     | 16                                  | <b>144</b>    |
| <b>Total</b>                 | <b>2,487</b>             | <b>2,379</b>              | <b>2,333</b>                              | <b>4,878</b>              | <b>417</b>                            | <b>1,336</b>                        | <b>13,830</b> |

*Abbreviations:* DHS: Demographic and Health Surveys; RHS: Reproductive Health Surveys; WHO: World Health Organization; MICS: Multiple Indicator Cluster Surveys; VACS: Violence against Children Surveys; GSHS: Global Student Health Surveys; HBSC: Health Behaviour in School-Aged Children; PIRLS: Progress in International Reading Literacy Study; TIMSS: Trends in International Mathematics and Science Study; GSS: Good Schools Study.
