# Supplementary material for: Who perpetrates violence against children? A systematic analysis of age-specific and sex-specific data
Source: PubMed Central journal article supplement — BMJ Paediatr Open. 2018 Feb 7;2(1):e000180. doi: 10.1136/bmjpo-2017-000180 (PMC5842994; doi:10.1136/bmjpo-2017-000180), 2018-02-07
Supplement: bmjpo-2017-000180supp009.pdf [file bmjpo-2017-000180supp009.pdf]

**Annex 9. Physical and emotional violence perpetrated by students against boys and girls in school and physical, emotional and sexual partner violence against girls among ever partnered girls.**

Figure 9.1. Prevalence of physical and emotional violence perpetrated by students against boys and girls in school in the past year (based on self-report).

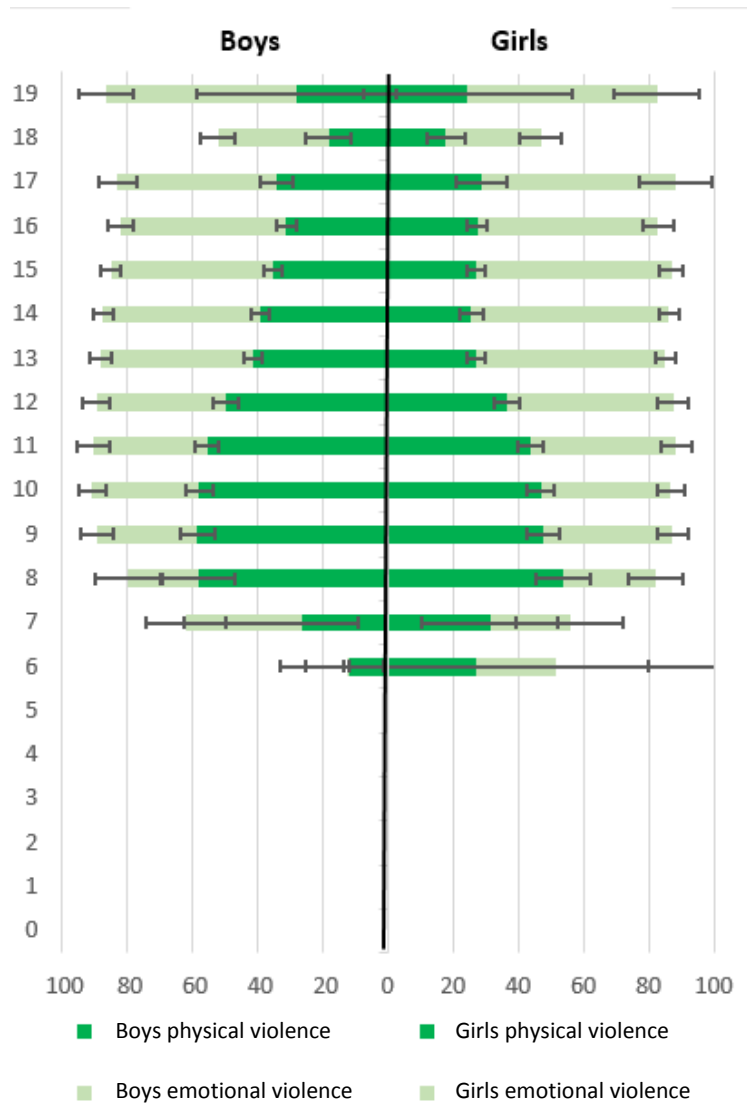

Notes: Estimates provided without adjustment for the WHO regional estimation proportion of students attending primary and secondary schools. Data sources: Global School-Based Health Surveys (GSHS), Health Behaviour in School-Aged Children (HBSC), Progress in International Reading Literacy Study (PIRLS), Trends in International Mathematics and Science Study (TIMSS) and systematic review publications. Definitions are provided in Annex 3. Pooled prevalence estimates at ages 6, 7 and 19 years are from unadjusted meta-analyses, all others are adjusted meta-regression estimates. To read bar graph: age of the child is on the y-axis; prevalence of each form of violence is on the x axis. Prevalence corresponds to the distance of the bar along the x-axis for boys (to the left), and girls (to the right). Forms of violence are overlaid; and the black bars are a 95% confidence interval.

Figure 9.2. Prevalence of physical, emotional and sexual partner violence against girls, estimated by age and for ever partnered girls.

| Violence type | sex   | age | Global estimate | lower CI | Upper CI |
|---------------|-------|-----|-----------------|----------|----------|
| Physical      | girls | 15  | 9.15            | 3.73     | 14.57    |
| Physical      | girls | 16  | 13.78           | 8.60     | 18.95    |
| Physical      | girls | 17  | 15.60           | 10.46    | 20.74    |
| Physical      | girls | 18  | 15.02           | 11.27    | 18.76    |
| Physical      | girls | 19  | 15.60           | 12.17    | 19.04    |
| Emotional     | girls | 15  | 11.91           | 5.79     | 18.04    |
| Emotional     | girls | 16  | 15.49           | 10.09    | 20.88    |
| Emotional     | girls | 17  | 11.21           | 7.51     | 14.91    |
| Emotional     | girls | 18  | 16.34           | 12.69    | 19.99    |
| Emotional     | girls | 19  | 19.05           | 14.69    | 23.41    |
| Sexual        | girls | 15  | 1.89            | 0.00     | 4.34     |
| Sexual        | girls | 16  | 6.96            | 2.52     | 11.40    |
| Sexual        | girls | 17  | 5.10            | 2.32     | 7.89     |
| Sexual        | girls | 18  | 8.38            | 5.36     | 11.39    |
| Sexual        | girls | 19  | 6.29            | 3.50     | 9.08     |

Notes: Ever partnered definition covariate in regression models: Study denominator definitions were categorised into similar groups creating a variable called "popug", where 0= ever married/ever partnered, and 1 currently married, 2 currently married/current partner, 3 currently married, 5 general population. Popug was added as a covariate in the meta-regression models, for example for partner physical violence: xi, noomit: metareg prevp i.WHOregion i.popug rep acts samp interview recallad if form=="phy" & perpsg=="Partner" & sex=="girls" & age=="a", wsse(sep) noconstant
